# Supplementary material for: Genome-Wide Association Mapping of Crown and Brown Rust Resistance in Perennial Ryegrass
Source: MDPI journal article supplement (doi:10.3390/genes13010020), 2021-12-22
Supplement: s1 [file s1]

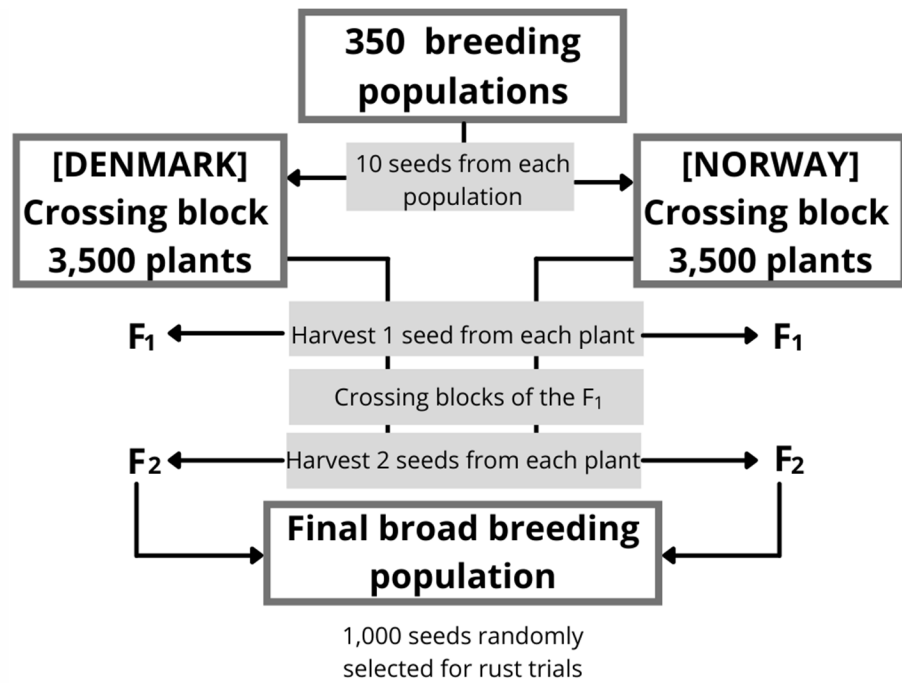

**Figure S1.** Flowchart of population development.

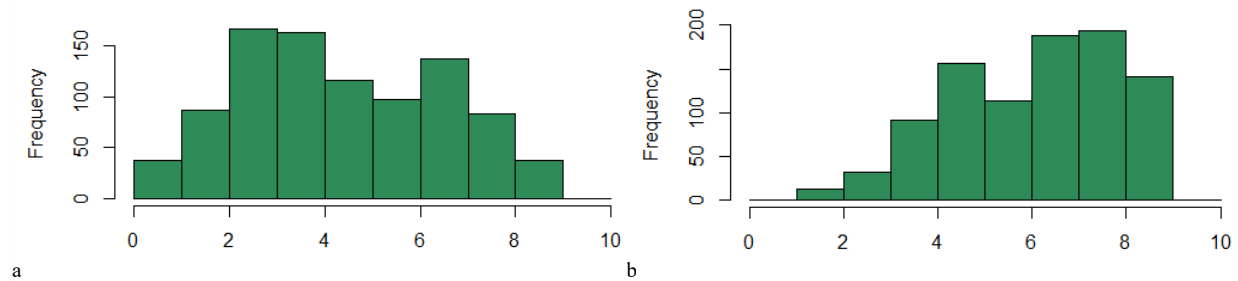

**Figure S2.** Phenotypic distribution among the 1,000 genotypes of crown (a) and brown rust (b). The x-axis refers to the scale used for the disease scoring, where 1 refers to heavy attack (high susceptibility of perennial ryegrass) and 9 corresponds to no rust infection (high tolerance).

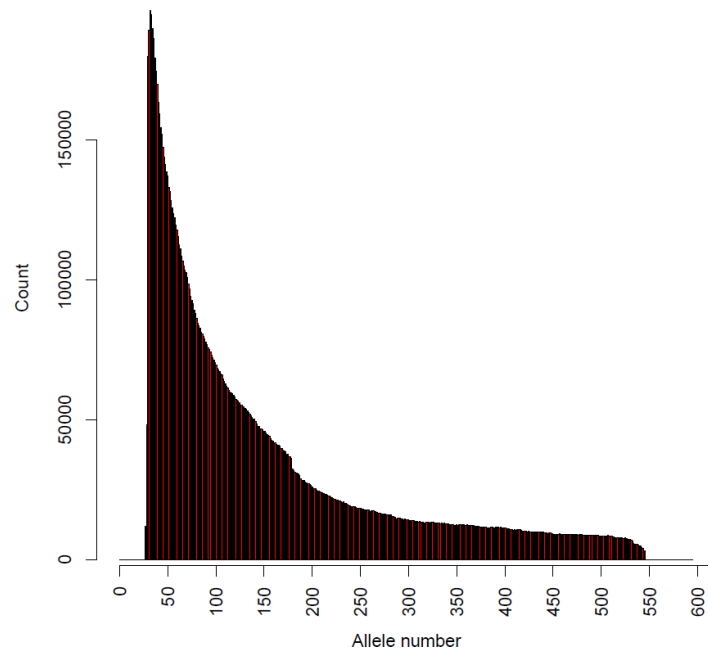

**Figure S3.** Site Frequency Spectrum (SFS) plot. Distribution of allele frequencies of the SNP loci in the population

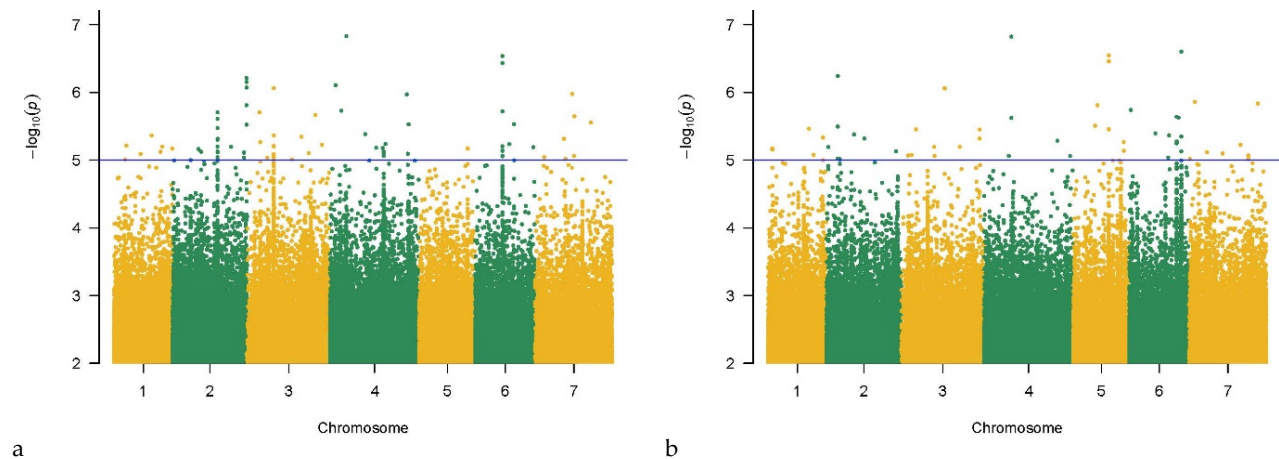

**Figure S4.** Manhattan plot GWAS results of CRR (a) and BRR (b). On the x-axis, the 7 chromosomes are reported in alternating colours. The blue horizontal line indicates the arbitrary cutoff of  $-\log_{10}(p\text{-value})=5$ .

**Table S1.** List of SNPs associated with CR. Selected markers with a  $p$ -value above the arbitrary threshold  $-\log_{10}(p\text{-value})>5$ .

| SNPs ID      | Chr | Position (bp) | p-value     |
|--------------|-----|---------------|-------------|
| Gcta-snp-1.1 | 1   | 50,888,681    | 8.82976e-06 |
| Gcta-snp-1.2 | 1   | 57,202,120    | 6.85289e-06 |
| Gcta-snp-1.3 | 1   | 123,289,042   | 7.1705e-06  |
| Gcta-snp-1.4 | 1   | 17,455,1781   | 4.39621e-06 |
| Gcta-snp-1.5 | 1   | 216,254,732   | 7.8503e-06  |

---

|               |   |             |             |
|---------------|---|-------------|-------------|
| Gcta-snp-1.6  | 1 | 223,812,092 | 6.54172e-06 |
| Gcta-snp-1.7  | 1 | 270,501,016 | 7.68761e-06 |
| Gcta-snp-2.1  | 2 | 84,442,240  | 9.82199e-06 |
| Gcta-snp-2.2  | 2 | 120,467,462 | 7.239e-06   |
| Gcta-snp-2.3  | 2 | 132,102,685 | 8.4921e-06  |
| Gcta-snp-2.4  | 2 | 208,763,776 | 1.8167e-06  |
| Gcta-snp-2.5  | 2 | 208,763,879 | 6.0652e-06  |
| Gcta-snp-2.6  | 2 | 208,765,282 | 8.73605e-06 |
| Gcta-snp-2.7  | 2 | 208,806,413 | 9.51495e-06 |
| Gcta-snp-2.8  | 2 | 208,810,723 | 9.9128e-06  |
| Gcta-snp-2.9  | 2 | 208,811,051 | 3.20473e-06 |
| Gcta-snp-2.10 | 2 | 208,829,396 | 8.9686e-06  |
| Gcta-snp-2.11 | 2 | 208,834,020 | 2.23917e-06 |
| Gcta-snp-2.12 | 2 | 208,834,440 | 4.63526e-06 |
| Gcta-snp-2.13 | 2 | 208,848,996 | 7.28031e-06 |
| Gcta-snp-2.14 | 2 | 209,769,507 | 4.5522e-06  |
| Gcta-snp-2.15 | 2 | 271,678,020 | 6.66405e-06 |
| Gcta-snp-2.16 | 2 | 331,778,177 | 9.69674e-06 |
| Gcta-snp-2.17 | 2 | 331,831,873 | 8.31896e-06 |
| Gcta-snp-2.18 | 2 | 343,028,606 | 8.33522e-07 |
| Gcta-snp-2.19 | 2 | 343,028,650 | 6.93544e-07 |
| Gcta-snp-2.20 | 2 | 343,029,116 | 5.74696e-07 |
| Gcta-snp-3.1  | 3 | 56,959,112  | 1.83089e-06 |
| Gcta-snp-3.2  | 3 | 123,400,748 | 7.75118e-07 |
| Gcta-snp-3.3  | 3 | 123,493,806 | 4.20124e-06 |
| Gcta-snp-3.4  | 3 | 123,499,279 | 9.91972e-06 |
| Gcta-snp-3.5  | 3 | 123,511,283 | 5.67409e-06 |
| Gcta-snp-3.6  | 3 | 251,948,944 | 4.38419e-06 |
| Gcta-snp-3.7  | 3 | 285,814,253 | 7.77014e-06 |
| Gcta-snp-3.8  | 3 | 316,837,904 | 2.28292e-06 |
| Gcta-snp-3.9  | 3 | 347,482,523 | 6.66388e-06 |
| Gcta-snp-4.1  | 4 | 26,602,446  | 8.24678e-07 |
| Gcta-snp-4.2  | 4 | 53,000,213  | 2.20674e-06 |
| Gcta-snp-4.3  | 4 | 76,349,694  | 1.57119e-07 |
| Gcta-snp-4.4  | 4 | 163,621,753 | 3.93225e-06 |
| Gcta-snp-4.5  | 4 | 214,582,294 | 6.8227e-06  |
| Gcta-snp-4.6  | 4 | 244,680,870 | 7.4836e-06  |
| Gcta-snp-4.7  | 4 | 249,794,945 | 4.76004e-06 |
| Gcta-snp-4.8  | 4 | 257,511,725 | 5.6311e-06  |
| Gcta-snp-4.9  | 4 | 356,839,682 | 1.14406e-06 |
| Gcta-snp-4.10 | 4 | 361,318,775 | 8.68191e-06 |
| Gcta-snp-4.11 | 4 | 365,157,378 | 3.22589e-06 |
| Gcta-snp-5.1  | 5 | 224,633,296 | 6.94505e-06 |
| Gcta-snp-6.1  | 6 | 126,252,299 | 8.77432e-06 |
| Gcta-snp-6.2  | 6 | 126,253,264 | 7.34757e-06 |
| Gcta-snp-6.3  | 6 | 126,253,475 | 6.38375e-06 |
| Gcta-snp-6.4  | 6 | 126,254,672 | 3.6641e-07  |

---

|                     |   |             |             |
|---------------------|---|-------------|-------------|
| <b>Gcta-snp-6.5</b> | 6 | 126,255,271 | 4.86194e-06 |
| <b>Gcta-snp-6.6</b> | 6 | 158,207,491 | 6.63217e-06 |
| <b>Gcta-snp-6.7</b> | 6 | 270,303,728 | 5.81906e-06 |
| <b>Gcta-snp-7.1</b> | 7 | 43,143,239  | 9.11627e-06 |
| <b>Gcta-snp-7.2</b> | 7 | 172,435,701 | 1.07606e-06 |
| <b>Gcta-snp-7.3</b> | 7 | 181,138,453 | 9.07996e-06 |
| <b>Gcta-snp-7.4</b> | 7 | 183,420,642 | 2.32578e-06 |
| <b>Gcta-snp-7.5</b> | 7 | 259,535,462 | 2.9603e-06  |

**Table S2.** List of genes associated with CRR. Gene ID refers to the name of the gene, Chr refers to the chromosome where the gene is located, START and STOP refer to the gene's first and last nucleotide position on the chromosome, and Gene size refers to the gene size in bp.

| <b>Gene ID</b>           | <b>Chr</b> | <b>START</b> | <b>STOP</b> | <b>Gene size (bp)</b> |
|--------------------------|------------|--------------|-------------|-----------------------|
| <b>Lp_chr1_0.12850</b>   | chr1       | 174,544,889  | 174,548,709 | 3820                  |
| <b>Lp_chr1_0.12851</b>   | chr1       | 174,550,364  | 174,551,550 | 1186                  |
| <b>Lp_chr1_0.16593</b>   | chr1       | 223,810,306  | 223,812,121 | 1815                  |
| <b>Lp_chr2_0.6271</b>    | chr2       | 84,445,123   | 84,448,803  | 3680                  |
| <b>Lp_chr2_0.8753</b>    | chr2       | 120,466,171  | 120,468,611 | 2440                  |
| <b>Lp_chr2_0.24844</b>   | chr2       | 343,028,981  | 343,029,284 | 303                   |
| <b>Lp_chr2_0.24845</b>   | chr2       | 343,029,675  | 343,033,480 | 3805                  |
| <b>Lp_chr3_0.8551</b>    | chr3       | 123,396,008  | 123,396,638 | 630                   |
| <b>Lp_chr3_0.8552</b>    | chr3       | 123,400,198  | 123,400,828 | 630                   |
| <b>Lp_chr3_0.17611</b>   | chr3       | 251,942,496  | 251,944,253 | 1757                  |
| <b>Lp_chr3_0.20045</b>   | chr3       | 285,813,172  | 285,815,144 | 1972                  |
| <b>Lp_chr3_0.24613</b>   | chr3       | 347,481,574  | 347,482,756 | 1182                  |
| <b>Lp_chr3_0.24615</b>   | chr3       | 347,485,871  | 347,488,371 | 2500                  |
| <b>Lp_chr4_0.2271</b>    | chr4       | 26,600,949   | 26,602,802  | 1853                  |
| <b>Lp_chr4_0.6124</b>    | chr4       | 76,351,602   | 76,351,911  | 309                   |
| <b>Lp_chr4_0.6125</b>    | chr4       | 76,353,862   | 76,356,228  | 2366                  |
| <b>Lp_chr4_0.18309</b>   | chr4       | 244,684,987  | 244,688,942 | 3955                  |
| <b>Lp_chr4_0.19179</b>   | chr4       | 257,503,274  | 257,507,594 | 4320                  |
| <b>Lp_chr4_0.19180</b>   | chr4       | 257,508,178  | 257,509,165 | 987                   |
| <b>Lp_chr4_0.19181</b>   | chr4       | 257,513,104  | 257,514,895 | 1791                  |
| <b>Lp_chr6_0.9029</b>    | chr6       | 126,251,598  | 126,256,062 | 4464                  |
| <b>Lp_chr7_0.1.18459</b> | chr7       | 259,529,572  | 259,531,605 | 2033                  |

**Table S3.** BLAST-N information of genes identified using GCTA and MAGMA for CRR. Expected Value (E-value) refers to the number of expected hits of similar quality that could found just by chance with the calculated score. Coverage (Cov) refers to the percent of the query length included in the aligned segments. Identity (I) refers to the highest percent identity for a set of aligned segments to the same subject sequence.

| <b>Gene ID</b>                | <b>Organism</b>    | <b>E-value</b> | <b>Cov (%)</b> | <b>I (%)</b> | <b>Accession number</b> | <b>Putative function</b>          |
|-------------------------------|--------------------|----------------|----------------|--------------|-------------------------|-----------------------------------|
| <b>Lp_chr1_0.12850 (GCTA)</b> | <i>A. tauschii</i> | 0              | 100            | 90.53        | XM_020337866.1          | protein root UVB sensitive 6-like |

|                                     |                       |           |     |       |                |                                                            |
|-------------------------------------|-----------------------|-----------|-----|-------|----------------|------------------------------------------------------------|
| Lp_chr1_0.12851<br>(GCTA)           | <i>A. tauschii</i>    | 3.00e-112 | 66  | 80.22 | XM_020323781.1 | wall-associated receptor kinase                            |
| Lp_chr1_0.16593<br>(GCTA)           | <i>B. distachyon</i>  | 0         | 99  | 87.55 | XM_003568324.4 | tubby-like protein                                         |
| Lp_chr2_0.6271<br>(GCTA)            | <i>A. tauschii</i>    | 0         | 99  | 93.76 | XM_020335834.1 | cinnamate 4-monooxygenase-like                             |
| Lp_chr2_0.22569<br>(MAGMA)          | -                     | -         | -   | -     | -              |                                                            |
| Lp_chr2_0.24844<br>(GCTA,<br>MAGMA) | -                     | -         | -   | -     | -              |                                                            |
| Lp_chr2_0.24845<br>(GCTA)           | <i>A. tauschii</i>    | 0         | 47  | 86.75 | XM_020322177.1 | a transmembrane receptor protein kinase TMK1               |
| Lp_chr2_0.8753<br>(GCTA,<br>MAGMA)  | <i>B. distachyon</i>  | 3.00e-04  | 2   | 97.14 | XM_024461354.1 |                                                            |
| Lp_chr3_0.8552<br>(GCTA)            | <i>A. tauschii</i>    | 0         | 100 | 91.08 | XM_020298474.1 | VQ motif                                                   |
| Lp_chr3_0.8555<br>(GCTA-<br>MAGMA)  | <i>Avena strigosa</i> | 0         | 62  | 84.90 | DQ680849.1½    | Sad1 and Sad2                                              |
| Lp_chr3_0.17805<br>(GCTA,<br>MAGMA) | <i>A. tauschii</i>    | 0         | 96  | 80    | XM_020296375.1 | oxygenase called indole-3-pyruvate monooxygenase (YUCCA10) |
| Lp_chr3_0.20704<br>(GCTA)           | <i>L. perenne</i>     | 0         | 97  | 94.15 | KY771172.1     | beta-1-6-glucanase-like protein                            |
| Lp_chr3_0.20827<br>(MAGMA)          | <i>A. tauschii</i>    | 0         | 91  | 81.12 | XM_020342790.1 | 4hydroxyphenylacetaldehyde oxime monooxygenase-like        |
| Lp_chr4_0.2271<br>(GCTA,<br>MAGMA)  | <i>A. tauschii</i>    | 0         | 96  | 87.01 | XM_020293186.1 | NRT1/PTR family 5.7-like                                   |
| Lp_chr4_0.6084<br>(GCTA)            | <i>A. tauschii</i>    | 0         | 64  | 86.05 | XM_003560396.4 | phosphatidylinositol transfer                              |
| Lp_chr4_0.6125<br>(GCTA)            | <i>A. tauschii</i>    | 0         | 91  | 77.39 | XM_020318203.1 | chaperone protein ClpB1-like.                              |
| Lp_chr4_0.18630<br>(GCTA,<br>MAGMA) | <i>A. tauschii</i>    | 0         | 99  | 87.81 | XM_020306365.1 | metacaspase-1-like.                                        |
| Lp_chr4_0.18634<br>(GCTA,<br>MAGMA) | <i>A. tauschii</i>    | 0         | 100 | 84.44 | XM_020298243.1 | metacaspase-1-like.                                        |
| Lp_chr4_0.19180<br>(GCTA)           | <i>A. tauschii</i>    | 0         | 100 | 87.78 | XM_020343272.1 | pentatricopeptide repeat (PRR) proteins                    |
| Lp_chr4_0.20313<br>(GCTA)           | <i>A. tauschii</i>    | 0         | 66  | 86.02 | XM_020296375.1 | oxygenase called indole-3-pyruvate monooxygenase (YUCCA10) |

|                                             |                             |          |     |       |                |                                   |
|---------------------------------------------|-----------------------------|----------|-----|-------|----------------|-----------------------------------|
| <b>Lp_chr5_0.16081<br/>(MAGMA)</b>          | <i>A. tauschii</i>          | 2.00e-33 | 8   | 82.97 | KY771172.1     | beta-1-6-glucanase-like protein.  |
| <b>Lp_chr6_0.9029<br/>(GCTA,<br/>MAGMA)</b> | <i>A. tauschii</i>          | 0        | 100 | 93.39 | XM_020321879.1 | plastid casein kinase 2 (CK2)     |
| <b>Lp_chr7_0.1.9979<br/>(GCTA)</b>          | <i>L. perenne</i>           | 6.00e-07 | 2   | 100   | KY771172.1     | beta-1-6-glucanase-like protein.  |
| <b>Lp_chr7_0.1.11324<br/>(GCTA)</b>         | <i>B. distachyon</i>        | 0        | 100 | 86.13 | XM_003574460.4 | ubiquitin receptor RAD23.         |
| <b>Lp_chr7_0.1.24966<br/>(MAGMA)</b>        | <i>Triticum dicoccoides</i> | 0        | 96  | 82.60 | XM_037607392.1 | Disease resistance protein Pik-2. |

**Table S4.** List of SNPs associated with BRR. Selected markers with a  $p$ -value above the arbitrary threshold  $-\log_{10}(p\text{-value}) > 5$ .

| <b>SNP ID</b>   | <b>Chr</b> | <b>position</b> | <b>p-value</b> |
|-----------------|------------|-----------------|----------------|
| BR-Gcta-snp-1.1 | 1          | 20,121,295      | 6.98e-01       |
| BR-Gcta-snp-1.2 | 1          | 20,121,300      | 6.57e-01       |
| BR-Gcta-snp-1.3 | 1          | 189,974,240     | 3.56e-01       |
| BR-Gcta-snp-1.4 | 1          | 211,929,165     | 9.57e-01       |
| BR-Gcta-snp-1.5 | 1          | 255,276,992     | 4.56e-01       |
| BR-Gcta-snp-2.1 | 2          | 8,243,648       | 6.30e-01       |
| BR-Gcta-snp-2.2 | 2          | 52,157,077      | 3.17e-01       |
| BR-Gcta-snp-2.3 | 2          | 52,180,401      | 9.51e-01       |
| BR-Gcta-snp-2.4 | 2          | 52,180,410      | 6.12e-02       |
| BR-Gcta-snp-2.5 | 2          | 61,858,721      | 9.92e-01       |
| BR-Gcta-snp-2.6 | 2          | 127,577,619     | 4.62e-01       |
| BR-Gcta-snp-2.7 | 2          | 175,999,676     | 4.94e-01       |
| BR-Gcta-snp-2.8 | 2          | 323,147,284     | 8.09e-01       |
| BR-Gcta-snp-3.1 | 3          | 32,254,304      | 8.91e-01       |
| BR-Gcta-snp-3.2 | 3          | 48,819,030      | 7.89e-01       |
| BR-Gcta-snp-3.3 | 3          | 68,544,650      | 3.42e-01       |
| BR-Gcta-snp-3.4 | 3          | 152,867,482     | 6.66e-02       |
| BR-Gcta-snp-3.5 | 3          | 154,994,124     | 9.03e-01       |
| BR-Gcta-snp-3.6 | 3          | 201,638,596     | 8.82e-02       |
| BR-Gcta-snp-3.7 | 3          | 271,821,353     | 6.63e-01       |
| BR-Gcta-snp-3.8 | 3          | 363,850,690     | 5.40e-01       |
| BR-Gcta-snp-4.1 | 4          | 116,156,855     | 8.11e-01       |
| BR-Gcta-snp-4.2 | 4          | 127,117,474     | 2.39e-02       |
| BR-Gcta-snp-4.3 | 4          | 127,117,513     | 1.44e-02       |
| BR-Gcta-snp-4.4 | 4          | 339,683,441     | 5.37e-01       |
| BR-Gcta-snp-4.5 | 4          | 399,341,149     | 8.16e-01       |
| BR-Gcta-snp-5.1 | 5          | 101,345,714     | 3.42e-01       |
| BR-Gcta-snp-5.2 | 5          | 112,656,442     | 1.69e-01       |
| BR-Gcta-snp-5.3 | 5          | 164,117,281     | 3.77e-01       |
| BR-Gcta-snp-5.4 | 5          | 164,899,699     | 3.58e-02       |

|                 |   |             |          |
|-----------------|---|-------------|----------|
| BR-Gcta-snp-5.5 | 5 | 233,960,573 | 5.79e-01 |
| BR-Gcta-snp-5.6 | 5 | 234,361,710 | 7.44e-01 |
| BR-Gcta-snp-6.1 | 6 | 7,336,647   | 1.86e-01 |
| BR-Gcta-snp-6.2 | 6 | 121,008,266 | 4.23e-01 |
| BR-Gcta-snp-6.3 | 6 | 180,310,095 | 9.58e-01 |
| BR-Gcta-snp-6.4 | 6 | 184,483,550 | 4.34e-01 |
| BR-Gcta-snp-6.5 | 6 | 219,585,587 | 2.51e-01 |
| BR-Gcta-snp-6.6 | 6 | 219,586,506 | 5.76e-01 |
| BR-Gcta-snp-6.7 | 6 | 227,975,953 | 2.51e-01 |
| BR-Gcta-snp-6.8 | 6 | 241,419,154 | 7.54e-01 |
| BR-Gcta-snp-7.1 | 7 | 27,365,296  | 1.38e-01 |
| BR-Gcta-snp-7.2 | 7 | 83,124,103  | 7.53e-01 |
| BR-Gcta-snp-7.3 | 7 | 156,537,933 | 8.19e-01 |
| BR-Gcta-snp-7.4 | 7 | 238,806,220 | 6.23e-01 |
| BR-Gcta-snp-7.5 | 7 | 275,454,738 | 9.88e-01 |
| BR-Gcta-snp-7.6 | 7 | 27,5494,480 | 8.77e-01 |
| BR-Gcta-snp-7.7 | 7 | 319,181,966 | 1.44e-01 |

**Table S5.** List of genes associated with BRR. Gene ID refers to the name of the gene Chr refers to the chromosome where the gene is located, START and STOP refer to the gene's first and last nucleotide position on the chromosome, and Gene size refers to the gene size in bp.

| Gene ID          | Chr  | START       | STOP        | Gene size (bp) |
|------------------|------|-------------|-------------|----------------|
| Lp_chr1_0.1542   | chr1 | 20,120,371  | 20,121,325  | 954            |
| Lp_chr1_0.18994  | chr1 | 255,276,205 | 255,278,383 | 2,178          |
| Lp_chr1_0.18995  | chr1 | 255,281,635 | 255,290,751 | 9,116          |
| Lp_chr2_0.622    | chr2 | 8,234,314   | 8,239,230   | 4,916          |
| Lp_chr2_0.623    | chr2 | 8,240,880   | 8,244,851   | 3,971          |
| Lp_chr2_0.3894   | chr2 | 52,178,587  | 52,182,215  | 3,628          |
| Lp_chr2_0.3895   | chr2 | 52,184,051  | 52,184,678  | 627            |
| Lp_chr2_0.23247  | chr2 | 323,143,203 | 323,146,714 | 3,511          |
| Lp_chr2_0.23248  | chr2 | 323,151,743 | 323,152,142 | 399            |
| Lp_chr3_0.3323   | chr3 | 48,815,776  | 48,816,132  | 356            |
| Lp_chr3_0.25825  | chr3 | 363,840,342 | 363,847,474 | 7,132          |
| Lp_chr3_0.25826  | chr3 | 363,848,840 | 363,852,037 | 3,197          |
| Lp_chr4_0.29466  | chr4 | 399,338,819 | 399,341,984 | 3,165          |
| Lp_chr4_0.29467  | chr4 | 399,343,955 | 399,344,255 | 300            |
| Lp_chr5_0.11861  | chr5 | 164,112,771 | 164,114,235 | 1,464          |
| Lp_chr5_0.11862  | chr5 | 164,117,453 | 164,119,064 | 1,611          |
| Lp_chr5_0.11921  | chr5 | 164,901,677 | 164,902,350 | 673            |
| Lp_chr5_0.16787  | chr5 | 234,358,978 | 234,359,638 | 660            |
| Lp_chr6_0.596    | chr6 | 7,338,230   | 7,341,436   | 3,206          |
| Lp_chr6_0.15799  | chr6 | 219,584,326 | 219,586,833 | 2,507          |
| Lp_chr6_0.15800  | chr6 | 219,587,444 | 219,589,409 | 1,965          |
| Lp_chr7_0.1.1922 | chr7 | 27,361,869  | 27,366,349  | 4,480          |
| Lp_chr7_0.1.6143 | chr7 | 83,126,037  | 83,126,433  | 396            |

|                   |      |             |             |       |
|-------------------|------|-------------|-------------|-------|
| Lp_chr7_0.1.11390 | chr7 | 156,531,318 | 156,533,534 | 2,216 |
| Lp_chr7_0.1.19634 | chr7 | 275,454,123 | 275,455,236 | 1,113 |
| Lp_chr7_0.1.19642 | chr7 | 275,494,595 | 275,495,775 | 1,180 |
| Lp_chr7_0.1.22707 | chr7 | 319,181,319 | 319,183,513 | 2,194 |

**Table S6.** BLAST-N information of genes identified using GCTA and MAGMA for BRR. Expected Value (E-value) refers to the number of hits of similar quality that could be found just by chance. Coverage (Cov) refers to the percent of the query length included in the aligned segments. Identity (I) refers to the highest percent identity for a set of aligned segments to the same subject sequence.

| Gene ID                                | Organism              | E value | Cov (%) | I (%)   | Accession number | Putative function                               |
|----------------------------------------|-----------------------|---------|---------|---------|------------------|-------------------------------------------------|
| evm.model.Lp_chr1_0.1542 (GCTA)        | <i>A. tauschii</i>    | 8e-153  | 88      | 78.87   | XM_020345349.1   | wall-associated receptor kinase (WAK)           |
| evm.model.Lp_chr1_0.1598 (MAGMA)       | <i>A. tauschii</i>    | 0       | 94      | 82.97   | XM_020341457.1   | disease resistance protein RPM1-like            |
| evm.model.Lp_chr1_0.2823 (MAGMA)       | -                     | -       | -       | -       | -                | -                                               |
| evm.model.Lp_chr1_0.18994 (GCTA)       | <i>A. tauschii</i>    | 7e-157  | 48      | 77.05   | XM_020327116.1   | BPT/POZ and MATH domain-containing protein      |
| evm.model.Lp_chr1_0.18995 (GCTA)       | <i>A. tauschii</i>    | 0       | 92      | 91.49   | XM_020296114.1   | Protein timeless homolog                        |
| evm.model.Lp_chr2_0.622 (GCTA)         | <i>T. dicoccoides</i> | 0       | 82      | 79.78   | XM_037619652.1   | Putative FBD-associated F-box protein At3g50710 |
| evm.model.Lp_chr2_0.623 (GCTA)         | <i>T. dicoccoides</i> | 0       | 85      | 8538.66 | XM_037619698.1   | Beta-1,4-xylosyltransferase IRX9                |
| evm.model.Lp_chr2_0.3894 (GCTA, MAGMA) | <i>B. distachyon</i>  | 1e-141  | 63      | 82.52   | XM_003562573.3   | serine/arginine-rich SC35-like                  |
| evm.model.Lp_chr2_0.3895 (GCTA)        | <i>B. distachyon</i>  | 1e-48   | 89      | 79.57   | XM_003572657.4   | S-noroclaurine synthase.                        |
| evm.model.Lp_chr2_0.19756 (MAGMA)      | <i>A. tauschii</i>    | 0       | 99      | 87.23   | XM_020329468.1   | uncharacterized                                 |
| evm.model.Lp_chr2_0.23247 (GCTA)       | <i>A. tauschii</i>    | 0       | 100     | 84.17   | XM_020330933.1   | codifies for AP2-like ethylene-responsive       |



|                                         |                            |       |     |       |                |                                                                      |
|-----------------------------------------|----------------------------|-------|-----|-------|----------------|----------------------------------------------------------------------|
|                                         |                            |       |     |       |                | transcription factor AIL5                                            |
| evm.model.Lp_chr2_0.23248 (GCTA)        | -                          | -     | -   | -     | -              | -                                                                    |
| evm.model.Lp_chr3_0.8432 (MAGMA)        | -                          | -     | -   | -     | -              | -                                                                    |
| evm.model.Lp_chr3_0.8507 (MAGMA)        | <i>A. tauschii</i>         | 0     | 51  | 86.23 | XM_020315688.1 | xaa-Pro dipeptidase-like                                             |
| evm.model.Lp_chr3_0.25825 (GCTA)        | <i>A. tauschii</i>         | 0     | 96  | 88.79 | XM_020339997.1 | NAD kinase 1                                                         |
| evm.model.Lp_chr3_0.25826 (GCTA, MAGMA) | <i>A. tauschii</i>         | 0     | 97  | 87.16 | XM_020339996.1 | inactive leucine-rich repeat receptor-like protein kinase At5g48380. |
| evm.model.Lp_chr3_0.3323 (GCTA)         | -                          | -     | -   | -     | -              | -                                                                    |
| evm.model.Lp_chr3_0.8509 (MAGMA)        | <i>Setaria viridis</i>     | 3e-46 | 77  | 74.08 | XM_034736952.1 | glutathione S-transferase GSTF1                                      |
| evm.model.Lp_chr3_0.9565 (MAGMA)        | <i>A. tauschii</i>         | 0     | 91  | 88.60 | XM_020335608.1 | serine incorporator                                                  |
| evm.model.Lp_chr3_0.23458 (MAGMA)       | <i>B. distachyon</i>       | 0     | 98  | 86.21 | XM_003570476.4 | Uncharacterized protein                                              |
| evm.model.Lp_chr4_0.29466 (GCTA)        | -                          | -     | -   | -     | -              | -                                                                    |
| evm.model.Lp_chr4_0.29467 (GCTA)        | -                          | -     | -   | -     | -              | -                                                                    |
| evm.model.Lp_chr5_0.11861 (GCTA)        | <i>A. tauschii</i>         | 0     | 97  | 80.93 | XM_010232430.2 | F-box/LRR-repeat protein 14.                                         |
| evm.model.Lp_chr5_0.11862 (GCTA)        | <i>A. tauschii</i>         | 0     | 87  | 88.51 | XM_020343219.1 |                                                                      |
| evm.model.Lp_chr5_0.11920 (MAGMA)       | <i>B. distachyon</i>       | 0     | 100 | 93.18 | XM_003577987.4 | heavy metal-associated (HMA) isoprenylated plant protein (HIPP) 23.  |
| evm.model.Lp_chr5_0.11921 (GCTA)        | <i>A. tauschii</i>         | 0     | 100 | 86.72 | XM_020300496.1 | GTP-binding protein                                                  |
| evm.model.Lp_chr5_0.16787 (GCTA)        | <i>Festuca arundinacea</i> | 0     | 90  | 90.79 | MH796656.1     | Dehydration responsive element binding protein 1B-like protein.      |
| evm.model.Lp_chr6_0.596 (GCTA)          | -                          | -     | -   | -     | -              | -                                                                    |

|                                                       |                            |       |     |       |                    |                                                        |
|-------------------------------------------------------|----------------------------|-------|-----|-------|--------------------|--------------------------------------------------------|
| <b>evm.model.Lp_chr6_0.1579<br/>9 (MAGMA)</b>         | <i>B.<br/>distachyon</i>   | 0     | 98  | 85.29 | XM_003570583.<br>4 | Type I inositol<br>polyphosphate<br>5- phosphatase 5.  |
| <b>evm.model.Lp_chr6_0.1580<br/>0 (GCTA, MAGMA)</b>   | <i>A. tauschii</i>         | 0     | 100 | 87.02 | XM_020300272.<br>1 | random slug<br>protein 5-like<br>isoform X1            |
| <b>evm.model.Lp_chr7_0.1.192<br/>2 (GCTA)</b>         | <i>A. tauschii</i>         | 0     | 90  | 78.60 | XM_020304986.<br>1 | chloride<br>intracellular<br>channel protein<br>6-like |
| <b>evm.model.Lp_chr7_0.1.614<br/>3 (GCTA)</b>         | <i>Sorghum<br/>bicolor</i> | 2e-55 | 75  | 80.91 | XM_002438295.<br>2 | glycine-rich cell<br>wall structural<br>proteins       |
| <b>evm.model.Lp_chr7_0.1.113<br/>90 (GCTA)</b>        | <i>B.<br/>distachyon</i>   | 1e-97 | 90  | 74.35 | XM_003574454.<br>4 | codifying for a<br>TIFY protein                        |
| <b>evm.model.Lp_chr7_0.1.227<br/>07 (GCTA, MAGMA)</b> | <i>A. tauschii</i>         | 0     | 100 | 91.76 | XM_020344125.<br>1 | cytochrome P450<br>77A3                                |
| <b>evm.model.Lp_chr7_0.1.196<br/>34 (GCTA)</b>        | <i>A. tauschii</i>         | 0     | 96  | 90.76 | XM_020291380.<br>1 | peroxidase P7-<br>like                                 |
| <b>evm.model.Lp_chr7_0.1.196<br/>42 (GCTA)</b>        | <i>A. tauschii</i>         | 0     | 100 | 91.76 | XM_020344125.<br>1 |                                                        |

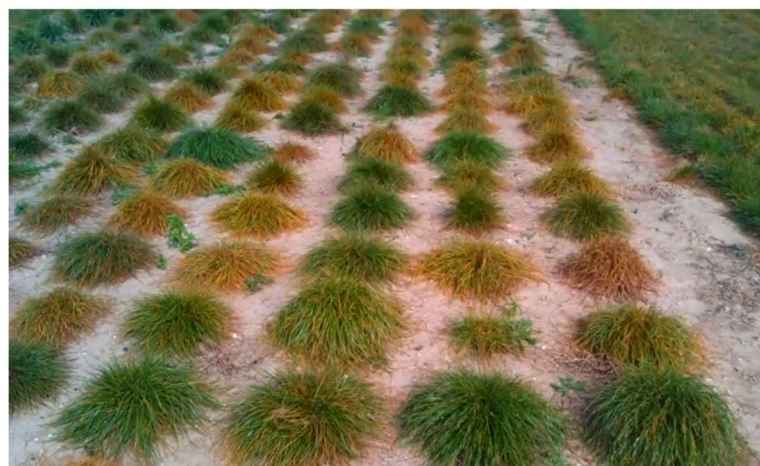

**Figure S5.** Symptoms of crown rust infection of perennial ryegrass.
